# Supplementary material
Source: publisher figshare collection journal article supplement (https://sage.figshare.com/ndownloader/files/34129134)
Supplement: Supplementary file 1 [file 34129134]

Archive with 1 entries (1 files):
- 34129134.out
